# Supplementary material for: ACVIM consensus statement on the diagnosis of immune‐mediated hemolytic anemia in dogs and cats
Source: PubMed Central journal article supplement — J Vet Intern Med. 2019 Feb 26;33(2):313–34. doi: 10.1111/jvim.15441 (PMC6430921; doi:10.1111/jvim.15441), 2019-02-26
Supplement: JVIM-33-313-s007.pdf [file JVIM-33-313-s007.pdf]

## Supplementary Information 7: Vector-borne Disease Screening – General Principles

### *Diagnostic testing*

The use of PCR and serological tests in screening for vector-borne disease has recently been reviewed in an ACVIM Consensus Statement.<sup>1</sup> Briefly, PCR testing for most vector-borne diseases is highly sensitive. However, some organisms, including *Babesia*, *Bartonella*, *Ehrlichia*, *Rickettsia* and *Anaplasma* species can circulate in peripheral blood intermittently and in low numbers.<sup>2-9</sup> Therefore, even though the diagnostic sensitivity of PCR may be very high, the clinical sensitivity in an individual patient can be low. Similarly, the sensitivity of serological testing can be low in the acute phase of infection, prior to seroconversion. For some organisms such as *Bartonella* and possibly *Babesia spp*, seroconversion may not occur in some patients.<sup>10-12</sup> Cross-reactivity between species and genera limit specificity of serological testing. Serology also does not distinguish between previous exposure and active infection. Combining PCR with serological testing enhances sensitivity.<sup>6,13,14</sup> Repeat testing, including repeating PCR on the same or additional samples, and pairwise serological testing to demonstrate a four-fold change between acute and convalescent titers, is also necessary to document infection in many cases.<sup>6-9,13,14</sup>

### *Risk of exposure and infection with vector-borne disease*

Although the distribution of vector-borne disease tends to follow its vectors, it is important to consider that the geographic distribution of many tick vectors and their associated pathogens is rapidly expanding.<sup>15-18</sup> Co-infection should be ruled out, especially if one agent is found during screening. For example, *Rhipicephalus sanguineus* is the confirmed or suspected

vector for multiple organisms, including *B. vogeli*, *E. canis*, *A. platys*, hemotropic *Mycoplasma* spp, *B. gibsoni*, and *Bartonella* spp.<sup>2,17,19-21</sup> Therefore, in the United States, *B. vogeli* should be ruled out in a dog with IMHA seropositive to *E. canis* on initial screening.

## References

1. Wardrop KJ, Birkenheuer A, Blais MC, et al. Update on canine and feline blood donor screening for blood-borne pathogens. *J Vet Intern Med* 2016;30:15-35.
2. Breitschwerdt EB, Maggi RG, Chomel BB, et al. Bartonellosis: an emerging infectious disease of zoonotic importance to animals and human beings. *J Vet Emerg Crit Care* 2010;20:8-30.
3. Duncan AW, Maggi RG, Breitschwerdt EB. A combined approach for the enhanced detection and isolation of Bartonella species in dog blood samples: pre-enrichment liquid culture followed by PCR and subculture onto agar plates. *J Microbiol Methods* 2007;69:273-281.
4. Egenvall A, Lilliehook I, Bjoersdorff A, et al. Detection of granulocytic Ehrlichia species DNA by PCR in persistently infected dogs. *Vet Rec* 2000;146:186-190.
5. Harrus S, Waner T. Diagnosis of canine monocytotropic ehrlichiosis (*Ehrlichia canis*): an overview. *Vet J* 2011;187:292-296.
6. Kidd L, Maggi R, Diniz PP, et al. Evaluation of conventional and real-time PCR assays for detection and differentiation of Spotted Fever Group Rickettsia in dog blood. *Vet Microbiol* 2008;129:294-303.
7. Nair AD, Cheng C, Ganta CK, et al. Comparative experimental infection study in dogs with *Ehrlichia canis*, *E. chaffeensis*, *Anaplasma platys* and *A. phagocytophilum*. *PLOS One* 2016;11:e0148239.
8. Starkey LA, Barrett AW, Beall MJ, et al. Persistent *Ehrlichia ewingii* infection in dogs after natural tick infestation. *J Vet Intern Med* 2015;29:552-555.

9. Starkey LA, Barrett AW, Chandrashekar R, et al. Development of antibodies to and PCR detection of Ehrlichia spp. in dogs following natural tick exposure. *Vet Microbiol* 2014;173:379-384.
10. Balakrishnan N, Musulin S, Varanat M, et al. Serological and molecular prevalence of selected canine vector borne pathogens in blood donor candidates, clinically healthy volunteers, and stray dogs in North Carolina. *Parasit Vectors* 2014;7:116.
11. Birkenheuer AJ, Levy MG, Savary KC, et al. Babesia gibsoni infections in dogs from North Carolina. *J Am Anim Hosp Assoc* 1999;35:125-128.
12. Farwell GE, LeGrand EK, Cobb CC. Clinical observations on Babesia gibsoni and Babesia canis infections in dogs. *J Am Vet Med Assoc* 1982;180:507-511.
13. Kidd L, Quorollo B, Lappin M, et al. Prevalence of vector-borne pathogens in southern California dogs with clinical and laboratory abnormalities consistent with immune-mediated disease. *J Vet Intern Med* 2017;31:1081-1090.
14. Maggi RG, Birkenheuer AJ, Hegarty BC, et al. Comparison of serological and molecular panels for diagnosis of vector-borne diseases in dogs. *Parasit Vectors* 2014;7:127.
15. Hansford KM, Phipps LP, Cull B, et al. Rhipicephalus sanguineus importation into the UK: surveillance, risk, public health awareness and One Health response. *Vet Rec* 2017;180:119.
16. Little SE, Beall MJ, Bowman DD, et al. Canine infection with Dirofilaria immitis, Borrelia burgdorferi, Anaplasma spp., and Ehrlichia spp. in the United States, 2010-2012. *Parasit Vectors* 2014;7:257.
17. Nicholson WL, Allen KE, McQuiston JH, et al. The increasing recognition of rickettsial pathogens in dogs and people. *Trends Parasitol* 2010;26:205-212.

18. Sonenshine DE. Range expansion of tick disease vectors in North America: implications for spread of tick-borne disease. *Int J Environ Res Public Health* 2018;15.
19. Dantas-Torres F. Biology and ecology of the brown dog tick, *Rhipicephalus sanguineus*. *Parasit Vectors* 2010;3:26.
20. Di Cicco MF, Downey ME, Beeler E, et al. Re-emergence of *Babesia conradae* and effective treatment of infected dogs with atovaquone and azithromycin. *Vet Parasitol* 2012;187:23-27.
21. Wikswo ME, Hu R, Metzger ME, et al. Detection of *Rickettsia rickettsii* and *Bartonella henselae* in *Rhipicephalus sanguineus* ticks from California. *J Med Entomol* 2007;44:158-162.
